# Supplementary material for: Extracellular Vesicle-Based Bronchoalveolar Lavage Fluid Liquid Biopsy for EGFR Mutation Testing in Advanced Non-Squamous NSCLC
Source: MDPI journal article supplement (doi:10.3390/cancers14112744), 2022-05-31
Supplement: s1 [file s1]

**Supplementary Table S1. Comparison of EGFR genotyping in matched tissue, BALF and plasma liquid biopsy (n=110).**

|                           |                         | Tissue (N=110)   |           |
|---------------------------|-------------------------|------------------|-----------|
|                           |                         | EGFR mutant type | Wild type |
|                           |                         | 66               | 44        |
| <b>BALF<br/>(N=110)</b>   | <b>EGFR mutant type</b> | 65               | 0         |
|                           | <b>Wild type</b>        | 1                | 44        |
| <b>Plasma<br/>(N=110)</b> | <b>EGFR mutant type</b> | 32               | 6         |
|                           | <b>Wild type</b>        | 34               | 38        |
